# Supplementary material for: GDF2 and BMP10 coordinate liver cellular crosstalk to maintain liver health
Source: eLife. 2024 Oct 25;13:RP95811. doi: 10.7554/eLife.95811 (PMC11509670; doi:10.7554/eLife.95811)
Supplement: Figure 1—figure supplement 3—source data 1. [file elife-95811-fig1-figsupp3-data1.xlsx]

## Sheet: Fig1-figure supplement 3A
Gdf2 CT Mean Values
Bmp10fl/fl	27.2511	28.1268	25.8616	27.3347
Bmp10fl/fl LratCre	27.1615	27.9098	27.4503	27.5934	27.1325	26.2729
Bmp10 CT Mean Values
Bmp10fl/fl	27.9753	29.5343	28.5182	29.7171
Bmp10fl/fl LratCre	36.3431	35.4705	36.1786	37.9577	37.5865	37.2139
Pol2 CT Mean Values
Bmp10fl/fl	24.5633	25.0831	23.4595	24.8408
Bmp10fl/fl LratCre	24.4049	25.3523	25.0135	24.1751	24.2663	23.7392
