# Supplementary material for: GDF2 and BMP10 coordinate liver cellular crosstalk to maintain liver health
Source: eLife. 2024 Oct 25;13:RP95811. doi: 10.7554/eLife.95811 (PMC11509670; doi:10.7554/eLife.95811)
Supplement: Figure 1—source data 1. [file elife-95811-fig1-data1.xlsx]

## Sheet: Figure 1A
Gdf2 CT Mean Values									Gdf2 CT Mean Values								Gdf2 CT Mean Values							Gdf2 CT Mean Values
Gdf2fl/fl Bmp10fl/fl	27.2113	24.423	26.1297	25.0753	27.3136	27.5875	27.1616		Gdf2fl/fl Bmp10fl/fl	28.5358	28.6254	29.831	27.7877	27.3838	28.8474		Gdf2fl/fl Bmp10fl/fl	26.2989	26.0467	26.4352	27.1014	26.8803		Gdf2fl/fl Bmp10fl/fl	28.4494	27.7308	27.9095	27.5002
Gdf2fl/fl Bmp10fl/fl LratCre	33.3913	32.8913	34.4806	33.6248	31.1603	32.722			Gdf2fl/fl Bmp10fl/fl Clec4fCre	28.9616	28.7847	26.6646	27.9244	26.3917			Gdf2fl/fl Bmp10fl/fl TekCre	28.7017	26.2894	26.8738	26.4727	30.1933		Gdf2fl/fl Bmp10fl/fl AlbCre	27.6137	28.3854	27.0713	27.5913
Bmp10 CT Mean Values									Bmp10 CT Mean Values								Bmp10 CT Mean Values							Bmp10 CT Mean Values
Gdf2fl/fl Bmp10fl/fl	27.6104	25.4463	28.1296	27.0865	28.664	27.3415	28.5295		Gdf2fl/fl Bmp10fl/fl	28.355	28.802	29.3878	28.6002	27.2987	29.3571		Gdf2fl/fl Bmp10fl/fl	27.4456	27.1823	28.5475	28.4646	27.8975		Gdf2fl/fl Bmp10fl/fl	30.6776	29.4111	29.762	29.8186
Gdf2fl/fl Bmp10fl/fl LratCre	37.0323	33.2704	35.8659	38.0305	34.8163	35.9832			Gdf2fl/fl Bmp10fl/fl Clec4fCre	29.8504	30.1469	28.9523	31.2106	28.9312			Gdf2fl/fl Bmp10fl/fl TekCre	29.4652	28.2073	28.1152	28.6896	29.3195		Gdf2fl/fl Bmp10fl/fl AlbCre	28.5681	29.3494	29.1824	29.5377
Pol2 CT Mean Values									Pol2 CT Mean Values								Pol2 CT Mean Values							Pol2 CT Mean Values
Gdf2fl/fl Bmp10fl/fl	24.6125	21.7956	24.1012	23.2343	24.5848	24.713	24.5026		Gdf2fl/fl Bmp10fl/fl	24.2503	24.0192	25.0698	24.2436	24.5914	25.0174		Gdf2fl/fl Bmp10fl/fl	23.9053	23.9713	24.1428	23.6316	23.4551		Gdf2fl/fl Bmp10fl/fl	25.3487	24.3167	24.3322	24.3785
Gdf2fl/fl Bmp10fl/fl LratCre	24.4614	23.1864	24.0368	24.7219	22.315	22.5451			Gdf2fl/fl Bmp10fl/fl Clec4fCre	24.9362	25.2621	24.7361	25.3116	24.2762			Gdf2fl/fl Bmp10fl/fl TekCre	26.5291	23.7713	23.4961	24.1335	25.9052		Gdf2fl/fl Bmp10fl/fl AlbCre	24.8034	26.1993	24.1932	24.7955

## Sheet: Figure 1C
Bmp10 CT Mean Values
Bmp9fl/fl Bmp10fl/fl	19.2523	17.9929	18.5218	18.9638
Bmp9fl/fl Bmp10fl/fl LratCre	18.5249	17.2775	18.4785	19.5088	19.3069
Pol2 CT Mean Values
Gdf2fl/fl Bmp10fl/fl	24.2531	22.497	23.1758	24.1857
Gdf2fl/fl Bmp10fl/fl LratCre	24.1824	22.1853	23.0955	24.0221	23.8486

## Sheet: Figure 1E
CLEC4F+ cells/mm2							F4/80+ cells/mm2
Gdf2fl/fl Bmp10fl/fl	560.01	503.6	418.97	441.17	454.65		Gdf2fl/fl Bmp10fl/fl	560.01	503.6	418.97	441.17	454.65
Gdf2fl/fl Bmp10fl/fl LratCre	0	2	0	0	0		Gdf2fl/fl Bmp10fl/fl LratCre	374.17	390.77	412.34	263	279.59

## Sheet: Figure 1F
Percentage of Tim4+ VSIG4+ KCs
Gdf2fl/fl Bmp10fl/fl	96.2	93.9	98
Gdf2fl/fl Bmp10fl/fl LratCre	1.43	0.38	0.77	0.21	2.8

## Sheet: Figure 1G
Percentage of LYVE1+ CLEC2+ ECs
Gdf2fl/fl Bmp10fl/fl	72.3	86.9	65
Gdf2fl/fl Bmp10fl/fl LratCre	0.12	0.06	0.037
