# Supplementary material for: GDF2 and BMP10 coordinate liver cellular crosstalk to maintain liver health
Source: eLife. 2024 Oct 25;13:RP95811. doi: 10.7554/eLife.95811 (PMC11509670; doi:10.7554/eLife.95811)
Supplement: Figure 2—figure supplement 1—source data 1. [file elife-95811-fig2-figsupp1-data1.xlsx]

## Sheet: Fig2-figure supplement 1C left
F4/80+CD64+ Mac/CD45+ cells (%)
Rxrαfl/+Csf1rCreClec4fDTR / Rxrαfl/flClec4fDTR	58.9	58.2	59.4	70.1	73.7
Rxrαfl/flCsf1rCreClec4fDTR	57.3	55.6	44.9	65.3

## Sheet: Fig2-figure supplement C middle
VSIG4+ Mac/F4/80+CD64+ Mac (%)
Rxrαfl/+Csf1rCreClec4fDTR / Rxrαfl/flClec4fDTR	40.75	41.1	43.3	49.6	42.9
Rxrαfl/flCsf1rCreClec4fDTR	21.1	22.42	17.21	24.99

## Sheet: Fig2-figure supplement 1C right
CLEC2+ Mac/F4/80+CD64+ Mac (%)
Rxrαfl/+Csf1rCreClec4fDTR / Rxrαfl/flClec4fDTR	98.7	98.6	99.2	99.2	99.4
Rxrαfl/flCsf1rCreClec4fDTR	59.4	64.6	62.8	83
