# Supplementary material for: GDF2 and BMP10 coordinate liver cellular crosstalk to maintain liver health
Source: eLife. 2024 Oct 25;13:RP95811. doi: 10.7554/eLife.95811 (PMC11509670; doi:10.7554/eLife.95811)
Supplement: Figure 2—source data 1. [file elife-95811-fig2-data1.xlsx]

## Sheet: Figure 2D
Timd4 expression					Cx3cr1 expression					Ccr2 expression
Gdf2fl/fl Bmp10fl/fl	60697	56510	40916		Gdf2fl/fl Bmp10fl/fl	2598	1624	1380		Gdf2fl/fl Bmp10fl/fl	803	585	233
Gdf2fl/fl Bmp10fl/fl LratCre	2768	1903	4644		Gdf2fl/fl Bmp10fl/fl LratCre	120251	195736	152313		Gdf2fl/fl Bmp10fl/fl LratCre	2917	8020	7611

## Sheet: Figure 2E
CD64+ cells/mm2							F4/80+ cells/mm2
Gdf2fl/fl Bmp10fl/fl	441.37	606.48	663.72	535.96	491.57		Gdf2fl/fl Bmp10fl/fl	454.65	441.17	418.97	503.6	560.01
Gdf2fl/fl Bmp10fl/fl LratCre	342.65	434.74	459.63	459.63	433.91		Gdf2fl/fl Bmp10fl/fl LratCre	374.17	390.77	412.34	263	279.59
