# Supplementary material for: GDF2 and BMP10 coordinate liver cellular crosstalk to maintain liver health
Source: eLife. 2024 Oct 25;13:RP95811. doi: 10.7554/eLife.95811 (PMC11509670; doi:10.7554/eLife.95811)
Supplement: Figure 3—source data 1. [file elife-95811-fig3-data1.xlsx]

## Sheet: Figure 3C
Gata4 expression					Maf expression
Gdf2fl/fl Bmp10fl/fl	21391	25091	27413		Gdf2fl/fl Bmp10fl/fl	111847	128438	128650
Gdf2fl/fl Bmp10fl/fl LratCre	2381	302	340		Gdf2fl/fl Bmp10fl/fl LratCre	69592	29257	13606

## Sheet: Figure 3F
CD34+ area %
Gdf2fl/fl Bmp10fl/fl	1.491	1.759	1.377	0.649
Gdf2fl/fl Bmp10fl/fl LratCre	8.229	7.466	7.195	4.674

## Sheet: Figure 3G
LYVE1+ cells/mm2									Endomucin+ cells/mm2
Gdf2fl/fl Bmp10fl/fl	172	207	235	168					Gdf2fl/fl Bmp10fl/fl	207	212	206	194
Gdf2fl/fl Bmp10fl/fl LratCre	9	7	4	10	1	2	5		Gdf2fl/fl Bmp10fl/fl LratCre	1103	892	1107	1051	901	894	870

## Sheet: Figure 3H
Percentage of CD32b+ Maf+ ECs
Gdf2fl/fl Bmp10fl/fl	93.5	87.1	90.2	82.6
Gdf2fl/fl Bmp10fl/fl LratCre	24.3	2.14	0.96	0.18	2.44

## Sheet: Figure 3I
Percentage of CD206+ CD117+ ECs
Gdf2fl/fl Bmp10fl/fl	90.3	87.2	80.2	74.6	76.5	83.1
Gdf2fl/fl Bmp10fl/fl LratCre	0.031	0.07	0	0.22	0.037	0.013
