# Supplementary material for: GDF2 and BMP10 coordinate liver cellular crosstalk to maintain liver health
Source: eLife. 2024 Oct 25;13:RP95811. doi: 10.7554/eLife.95811 (PMC11509670; doi:10.7554/eLife.95811)
Supplement: Figure 4—source data 1. [file elife-95811-fig4-data1.xlsx]

## Sheet: Figure 4B
PBA+ area (%)
Gdf2fl/fl Bmp10fl/fl	0.374	0.000482	0.377	0.021	0.027	0.102	0.021
Gdf2fl/fl Bmp10fl/fl LratCre	2.344	1.104	0.813	1.713	0.13	0.287	1.764

## Sheet: Figure 4C
GS area [μm2]							E-cadherin area [μm2]
Gdf2fl/fl Bmp10fl/fl	8050	8692	5705	7642	6154		Gdf2fl/fl Bmp10fl/fl	2550	4235	5593	6072	5039
Gdf2fl/fl Bmp10fl/fl LratCre	1	2	0	3	5		Gdf2fl/fl Bmp10fl/fl LratCre	9437	11433	12827	11851	12008

## Sheet: Figure 4E
GS area [μm2]				E-cadherin area [μm2]
Gdf2fl/fl	7013	10886		Gdf2fl/fl	812	1022
Gdf2fl/fl LratCre	12110	9261		Gdf2fl/fl LratCre	910	1251

## Sheet: Figure 4F
GS area [μm2]				E-cadherin area [μm2]
Bmp10fl/fl	5940	5669		Bmp10fl/fl	664	1021
Bmp10fl/fl LratCre	7587	6855		Bmp10fl/fl LratCre	886	1244
