# Supplementary material for: GDF2 and BMP10 coordinate liver cellular crosstalk to maintain liver health
Source: eLife. 2024 Oct 25;13:RP95811. doi: 10.7554/eLife.95811 (PMC11509670; doi:10.7554/eLife.95811)
Supplement: Figure 5—source data 1. [file elife-95811-fig5-data1.xlsx]

## Sheet: Figure 5A
liver weight	male	Gdf2fl/fl Bmp10fl/fl	1.41	1.18	1.46	1.42	1.09	1.08	1.14	1.33	1.34	1.22
		Gdf2fl/fl Bmp10fl/fl LratCre	1.07	0.98	1.04	1.07	0.82	0.95	1.24	0.95	0.98
body weight		Gdf2fl/fl Bmp10fl/fl	26.11	24.88	28.87	26.28	29.13	25.7	24.83	23.56	26.66	24.82
		Gdf2fl/fl Bmp10fl/fl LratCre	26.73	26.7	27.42	28.74	25.12	24.35	25.9	27.6	29.17
liver/body weight ratio		Gdf2fl/fl Bmp10fl/fl	0.0540023	0.0474277	0.0505715	0.0540335	0.0374185	0.0420233	0.0459122	0.0564516	0.0502626	0.0491539
		Gdf2fl/fl Bmp10fl/fl LratCre	0.0400299	0.0367041	0.0379285	0.0372303	0.0326433	0.0390144	0.0478764	0.0344203	0.0335962
liver weight	female	Gdf2fl/fl Bmp10fl/fl	0.92	1.06	1.02	1.11	1.17	0.82	1.3	0.93	1.03
		Gdf2fl/fl Bmp10fl/fl LratCre	0.82	0.93	0.78	1.03	0.78	0.8	0.65	1.22	1.12	0.87	0.98	0.93	0.68
body weight		Gdf2fl/fl Bmp10fl/fl	22.38	21.42	21.56	22.33	20.28	20.7	22.84	21.47	21.61
		Gdf2fl/fl Bmp10fl/fl LratCre	21.67	24.07	21.46	24.48	21.56	21.2	20.62	23.23	22.62	21.27	22.19	23.78	20.81
liver/body weight ratio		Gdf2fl/fl Bmp10fl/fl	0.0411081	0.0494865	0.0473098	0.0497089	0.0576923	0.0396135	0.0569177	0.0433163	0.0476631
		Gdf2fl/fl Bmp10fl/fl LratCre	0.0378403	0.0386373	0.0363467	0.0420752	0.0361781	0.0377358	0.0315228	0.0525183	0.0495137	0.0409027	0.044164	0.0391085	0.0326766

## Sheet: Figure 5B
Fibrotic area (%)
Gdf2fl/fl Bmp10fl/fl	0.151	0.234	0.214	0.089	0.102	0.092	0.111	0.402	0.095
Gdf2fl/fl Bmp10fl/fl LratCre	2.191	2.341	2.3	2.526	2.486	2.26	2.675	2.458	2.662	2.359

## Sheet: Figure 5C
Pdgfb expression in liver tissues					Pdgfb expression in endothelial cells					Pdgfb expression in liver macrophages
Gdf2fl/fl Bmp10fl/fl	164	250	171		Gdf2fl/fl Bmp10fl/fl	1007	519	638		Gdf2fl/fl Bmp10fl/fl	3335	1280	1351
Gdf2fl/fl Bmp10fl/fl LratCre	1463	948	958		Gdf2fl/fl Bmp10fl/fl LratCre	17955	10579	16203		Gdf2fl/fl Bmp10fl/fl LratCre	9715	7631	7453

## Sheet: Figure 5D
Desmin+ cells/mm2							Collagen I area (%)
Gdf2fl/fl Bmp10fl/fl	604.82	596.52	658.74	511.07	593.2		Gdf2fl/fl Bmp10fl/fl	0.256	1.718	0.618	0.929
Gdf2fl/fl Bmp10fl/fl LratCre	668.7	707.69	737.56	723.46	717.65		Gdf2fl/fl Bmp10fl/fl LratCre	5.047	4.079	5.073	7.184	5.322	5.33

## Sheet: Figure 5E
Collagen IV area (%)
Gdf2fl/fl Bmp10fl/fl	1.65955	0.774991	0.898889	1.66657
Gdf2fl/fl Bmp10fl/fl LratCre	8.03155	8.18523	8.42786	5.96712

## Sheet: Figure 5F
Col4a1 expression					Col4a2 expression
Gdf2fl/fl Bmp10fl/fl	23449	29039	37028		Gdf2fl/fl Bmp10fl/fl	27417	36601	47471
Gdf2fl/fl Bmp10fl/fl LratCre	102266	81411	94653		Gdf2fl/fl Bmp10fl/fl LratCre	119407	88467	118590
Col4a3 expression					Col4a4 expression
Gdf2fl/fl Bmp10fl/fl	136	193	192		Gdf2fl/fl Bmp10fl/fl	138	327	155
Gdf2fl/fl Bmp10fl/fl LratCre	1892	1962	1848		Gdf2fl/fl Bmp10fl/fl LratCre	1299	1670	1518
