# Supplementary material for: GDF2 and BMP10 coordinate liver cellular crosstalk to maintain liver health
Source: eLife. 2024 Oct 25;13:RP95811. doi: 10.7554/eLife.95811 (PMC11509670; doi:10.7554/eLife.95811)
Supplement: Supplementary file 1. [file elife-95811-supp1.xlsx]

## Sheet: Sheet1
TFs only downregulated in liver macrophages from GDF2/BMP10-HSC KO mice	TFs only downregulated in liver macrophages from Smad4fl/fl Vav1Cre mice	TFs downregulated in liver macrophages from both GDF2/BMP10-HSC KO mice mice and Smad4fl/fl Vav1Cre mice
Cebpe	5730507C01Rik	Creb3l3
Creb3l2	Ahrr	Dmrt2
Epas1	Ascl2	En2
Erg	Batf3	Erf
Esrrb	Dnajc2	Hey1
Foxa3	Gm13212	Id1
Gata4	Jdp2	Id2
Gtf2ird1	Mta3	Id3
Hic1	Pax5	Irf7
Hnf4a	Pou3f1	Nr1h3
Hoxa1	Satb1	Smad7
Hoxa4	Smad4	Smad9
Hoxb5	Zfp941	Thrb
Meis2		Tlx1
Nr1i3		Zbtb18
Ppara		Zbtb4
Purg		Zfp446
Rxra		Zfp532
Six5		Zfp811
Smad6
Spib
Tbx3
Tcf7l1
Tcf7l2
Tfec
Tshz3
Zfp239
Zfp507
Zfp951
