# Supplementary material for: GDF2 and BMP10 coordinate liver cellular crosstalk to maintain liver health
Source: eLife. 2024 Oct 25;13:RP95811. doi: 10.7554/eLife.95811 (PMC11509670; doi:10.7554/eLife.95811)
Supplement: Supplementary file 2. [file elife-95811-supp2.xlsx]

## Sheet: Sheet1
Supplementary file 2. Primers used for real-time PCR.
Gene	Forward primer	Reverse primer
mouse Pol2	CTGGTCCTTCGAATCCGCATC	GCTCGATACCCTGCAGGGTCA
mouse Gdf2	CTGGAAGGAAGCATGGTCGT	CCATCCTTCGTCCCGAATGT
mouse Bmp10	AACGCCAAGGGGAACTACTG	TTCATACCCAGGAGGAGCGA
